# Supplementary material for: Association of Hydroxylmethyl Glutaryl Coenzyme A Reductase Inhibitors, L-Type Calcium Channel Antagonists, and Biguanides With Rates of Psychiatric Hospitalization and Self-Harm in Individuals With Serious Mental Illness
Source: PubMed Central journal article supplement (PMC6450278; doi:10.1001/jamapsychiatry.2018.3907), 2019-01-09
Supplement: jamapsychiatry-76-382-s001.pdf [file jamapsychiatry-76-382-s001.pdf]

## Supplementary Online Content

Hayes JF, Lundin A, Wicks S, et al. Association of hydroxymethyl glutaryl coenzyme A reductase inhibitors, L-type calcium channel antagonists, and biguanides with rates of psychiatric hospitalization and self-harm in individuals with serious mental illness. *JAMA Psychiatry*. Published online January 9, 2019. doi:10.1001/jamapsychiatry.2018.3907

**eFigure.** Patient Flow Diagram

**eTable 1.** ICD Diagnostic Codes

**eTable 2.** Anatomical Therapeutic Chemical Classification System Codes

**eTable 3.** Baseline Characteristics of Patients Treated for Self-Harm

**eTable 4.** Baseline Characteristics of Patients Experiencing Nonpsychiatric Hospitalization

**eTable 5.** Baseline characteristics of Patients Prescribed Thiazide Diuretics

eFigure. Patient Flow Diagram

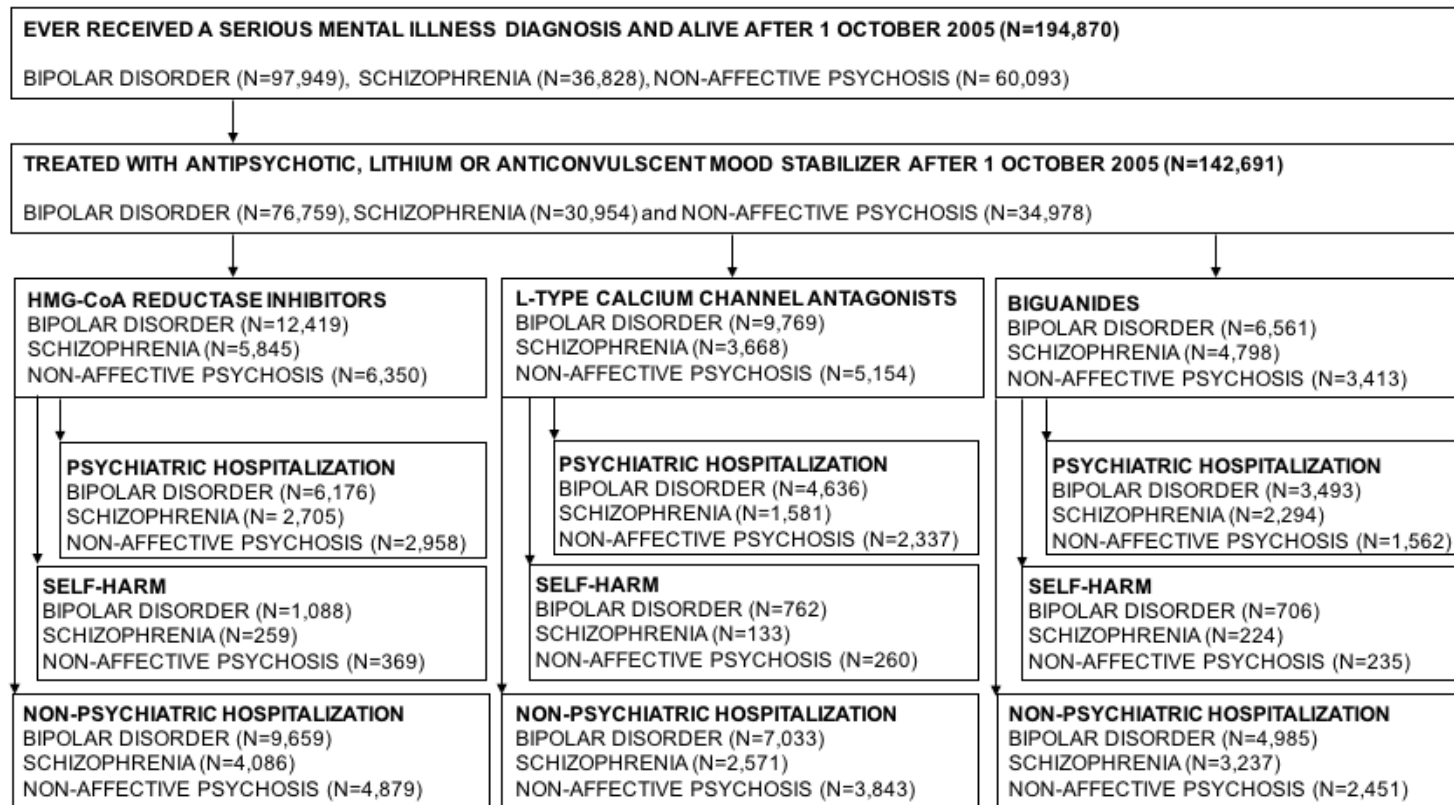

**eTable 1. ICD Diagnostic Codes**

| <b>Diagnosis</b>                          | <b>ICD-9</b>                                                    | <b>ICD-10</b>                                                 |
|-------------------------------------------|-----------------------------------------------------------------|---------------------------------------------------------------|
| BPD                                       | 296A, C-E, W, X                                                 | F30-F31n                                                      |
| Schizophrenia                             | 295A-E, G, W, X                                                 | F20n                                                          |
| NAP                                       | 297, 298B-E, W, X                                               | F21-F24n, F28-F29n                                            |
| Cardiovascular or cerebrovascular disease | 390-405, 410-429, 440-459, 430-438                              | I00-I15, I20-I52, I60-I99,                                    |
| Type II diabetes mellitus                 | 250                                                             | E10-14                                                        |
| hypertension                              | 401                                                             | I10                                                           |
| hyperlipidemia                            | 272                                                             | E78                                                           |
| Self-harm                                 | E950-959 (with suicidal intent), E980-989 (undetermined intent) | X60-X84 (with suicidal intent), Y10-Y34 (undetermined intent) |

**eTable 2. Anatomical Therapeutic Chemical Classification System Codes**

| <b>Drug class</b>            | <b>Drug name</b> | <b>ATC Code</b> |
|------------------------------|------------------|-----------------|
| HMG-CoA reductase inhibitors | Simvastatin      | C10AA01         |
|                              | Lovastatin       | C10AA02         |
|                              | Pravastatin      | C10AA03         |
|                              | Fluvastatin      | C10AA04         |
|                              | Atorvastatin     | C10AA05         |
|                              | Cerivastatin     | C10AA06         |
|                              | Rosuvastatin     | C10AA07         |
|                              | Pitavastatin     | C10AA08         |
| LTCC antagonist              | Amlodipine       | C08CA01         |
|                              | Felodipine       | C08CA02         |
|                              | Isradipine       | C08CA03         |
|                              | Nicardipine      | C08CA04         |
|                              | Nifedipine       | C08CA05         |
|                              | Nimodipine       | C08CA06         |
|                              | Nisoldipine      | C08CA07         |

|            |                          |         |
|------------|--------------------------|---------|
|            | Nitrendipine             | C08CA08 |
|            | Lacidipine               | C08CA09 |
|            | Nilvadipine              | C08CA10 |
|            | Manidipine               | C08CA11 |
|            | Barnidipine              | C08CA12 |
|            | Lercanidipine            | C08CA13 |
|            | Cilnidipine              | C08CA14 |
|            | Benidipine               | C08CA15 |
|            | Clevidipine              | C08CA16 |
|            | Nifedipine, combinations | C08CA55 |
|            | Verapamil                | C08DA01 |
|            | Gallopamil               | C08DA02 |
|            | Verapamil, combinations  | C08DA51 |
|            | Diltiazem                | C08DB01 |
| Biguanides | Phenformin               | A10BA01 |
|            | Metformin                | A10BA02 |
|            | Buformin                 | A10BA03 |

|                        |                     |         |
|------------------------|---------------------|---------|
| Thiazide diuretics     | Bendroflumethiazide | C03AA01 |
|                        | Hydroflumethiazide  | C03AA02 |
|                        | Hydrochlorothiazide | C03AA03 |
|                        | Chlorothiazide      | C03AA04 |
|                        | Polythiazide        | C03AA05 |
|                        | Trichlormethiazide  | C03AA06 |
|                        | Cyclopentiazide     | C03AA07 |
|                        | Methyclothiazide    | C03AA08 |
|                        | Cyclothiazide       | C03AA09 |
|                        | Mebutizide          | C03AA13 |
| Typical antipsychotics | Chlorpromazine      | N05AA01 |
|                        | Levomepromazine     | N05AA02 |
|                        | Promazine           | N05AA03 |
|                        | Acepromazine        | N05AA04 |
|                        | Triflupromazine     | N05AA05 |
|                        | Cyamemazine         | N05AA06 |
|                        | Chlorproethazine    | N05AA07 |

|  |                  |         |
|--|------------------|---------|
|  | Dixyrazine       | N05AB01 |
|  | Fluphenazine     | N05AB02 |
|  | Perphenazine     | N05AB03 |
|  | Prochlorperazine | N05AB04 |
|  | Thiopropazate    | N05AB05 |
|  | Trifluoperazine  | N05AB06 |
|  | Acetophenazine   | N05AB07 |
|  | Thiopropazine    | N05AB08 |
|  | Butaperazine     | N05AB09 |
|  | Perazine         | N05AB10 |
|  | Periciazine      | N05AC01 |
|  | Thioridazine     | N05AC02 |
|  | Mesoridazine     | N05AC03 |
|  | Pipotiazine      | N05AC04 |
|  | Haloperidol      | N05AD01 |
|  | Trifluoperidol   | N05AD02 |
|  | Melperone        | N05AD03 |

|                         |                 |         |
|-------------------------|-----------------|---------|
|                         | Moperone        | N05AD04 |
|                         | Pipamperone     | N05AD05 |
|                         | Bromperidol     | N05AD06 |
|                         | Benperidol      | N05AD07 |
|                         | Droperidol      | N05AD08 |
|                         | Fluanisone      | N05AD09 |
|                         | Flupentixol     | N05AF01 |
|                         | Clopenthixol    | N05AF02 |
|                         | Chlorprothixene | N05AF03 |
|                         | Thiothixene     | N05AF04 |
|                         | Zuclopenthixol  | N05AF05 |
|                         | Fluspirilene    | N05AG01 |
|                         | Pimozide        | N05AG02 |
|                         | Penfluridol     | N05AG03 |
|                         | Prothipendyl    | N05AX07 |
| Atypical antipsychotics | Risperidone     | N05AX08 |
|                         | Mosapramine     | N05AX10 |



|  |               |         |
|--|---------------|---------|
|  | Zotepine      | N05AX11 |
|  | Aripiprazole  | N05AX12 |
|  | Paliperidone  | N05AX13 |
|  | Iloperidone   | N05AX14 |
|  | Cariprazine   | N05AX15 |
|  | Brexpiprazole | N05AX16 |
|  | Oxypertine    | N05AE01 |
|  | Molindone     | N05AE02 |
|  | Sertindole    | N05AE03 |
|  | Ziprasidone   | N05AE04 |
|  | Lurasidone    | N05AE05 |
|  | Loxapine      | N05AH01 |
|  | Clozapine     | N05AH02 |
|  | Olanzapine    | N05AH03 |
|  | Quetiapine    | N05AH04 |
|  | Asenapine     | N05AH05 |
|  | Clotiapine    | N05AH06 |

|                                       |               |         |
|---------------------------------------|---------------|---------|
|                                       | Sulpiride     | N05AL01 |
|                                       | Sultopride    | N05AL02 |
|                                       | Tiapride      | N05AL03 |
|                                       | Remoxipride   | N05AL04 |
|                                       | Amisulpride   | N05AL05 |
|                                       | Veralipride   | N05AL06 |
|                                       | Levosulpiride | N05AL07 |
| Lithium                               | Lithium       | N05AN01 |
| Anticonvulsant class mood stabilizers | Valproic acid | N03AG01 |
|                                       | Lamotrigine   | N03AX09 |
|                                       | Carbamazepine | N03AF01 |

**eTable 3. Baseline Characteristics of Patients Treated for Self-Harm**

|                                                       | HMG-CoA reductase inhibitors |                  |                  | L-type calcium channel antagonists |                  |                  | Biguanides       |                  |                  |
|-------------------------------------------------------|------------------------------|------------------|------------------|------------------------------------|------------------|------------------|------------------|------------------|------------------|
|                                                       | BPD                          | Schizophrenia    | NAP              | BPD                                | Schizophrenia    | NAP              | BPD              | Schizophrenia    | NAP              |
| <b>N</b>                                              | 1,088                        | 259              | 369              | 762                                | 133              | 260              | 706              | 224              | 235              |
| <b>Age at start of follow-up, mean (SD)</b>           | 50.27<br>(12.76)             | 44.52<br>(13.39) | 49.66<br>(15.92) | 51.17<br>(13.93)                   | 50.15<br>(12.97) | 52.73<br>(16.13) | 43.39<br>(15.09) | 42.44<br>(13.55) | 42.95<br>(15.49) |
| <b>Female sex, N (%)</b>                              | 665<br>(61.12)               | 129<br>(49.81)   | 194<br>(52.57)   | 460<br>(60.37)                     | 64<br>(48.12)    | 137<br>(52.69)   | 450<br>(63.74)   | 120<br>(53.57)   | 131<br>(55.74)   |
| <b>Swedish born, N (%)</b>                            | 915<br>(84.10)               | 192<br>(74.13)   | 289<br>(78.32)   | 646<br>(84.78)                     | 105<br>(78.95)   | 198<br>(76.15)   | 579<br>(82.01)   | 159<br>(70.98)   | 181<br>(77.02)   |
| <b>Died during follow-up, N (%)</b>                   | 179<br>(16.45)               | 36<br>(13.90)    | 65<br>(17.62)    | 153<br>(20.08)                     | 37<br>(27.82)    | 62<br>(23.85)    | 111<br>(15.72)   | 39<br>(17.41)    | 32<br>(13.62)    |
| <b>Psychiatric treatment during follow-up, N (%):</b> |                              |                  |                  |                                    |                  |                  |                  |                  |                  |
| Antipsychotic                                         | 940<br>(86.40)               | 255<br>(98.46)   | 351<br>(95.12)   | 621<br>(81.50)                     | 133<br>(100)     | 240<br>(92.31)   | 648<br>(91.78)   | 224<br>(100)     | 223<br>(94.89)   |
| Lithium                                               | 504<br>(46.32)               | 25<br>(9.65)     | 21<br>(5.69)     | 342<br>(44.88)                     | 5<br>(3.76)      | 10<br>(3.85)     | 357<br>(50.57)   | 19<br>(8.48)     | 20<br>(8.51)     |
| Anticonvulsant                                        | 759<br>(69.76)               | 79<br>(30.50)    | 105<br>(28.46)   | 497<br>(65.22)                     | 42<br>(31.58)    | 61<br>(23.46)    | 499<br>(70.68)   | 70<br>(31.25)    | 86<br>(36.60)    |
| <b>Physical health by end of follow-up, N (%):</b>    |                              |                  |                  |                                    |                  |                  |                  |                  |                  |
| Cardiovascular or cerebrovascular disease             | 378<br>(34.74)               | 66<br>(25.48)    | 133<br>(36.04)   | 639<br>(83.86)                     | 105<br>(78.95)   | 225<br>(86.54)   | 417<br>(59.07)   | 120<br>(53.57)   | 142<br>(60.43)   |
| Type II Diabetes Mellitus                             | 173<br>(15.90)               | 55<br>(21.24)    | 53<br>(14.36)    | 189<br>(24.80)                     | 54<br>(40.60)    | 75<br>(28.85)    | 488<br>(69.12)   | 166<br>(74.11)   | 166<br>(70.64)   |
| Hypertension                                          | 198<br>(18.20)               | 30<br>(11.58)    | 58<br>(15.72)    | 570<br>(74.80)                     | 92<br>(69.17)    | 197<br>(75.77)   | 296<br>(41.93)   | 73<br>(32.59)    | 103<br>(43.83)   |

|                                                            |                                              |                                              |                                              |                                              |                                              |                                              |                                              |                                              |                                              |
|------------------------------------------------------------|----------------------------------------------|----------------------------------------------|----------------------------------------------|----------------------------------------------|----------------------------------------------|----------------------------------------------|----------------------------------------------|----------------------------------------------|----------------------------------------------|
| Hyperlipidemia                                             | 82<br>(7.54)                                 | 14<br>(5.41)                                 | 35<br>(9.49)                                 | 90<br>(11.81)                                | 12<br>(9.02)                                 | 30<br>(11.54)                                | 99<br>(14.02)                                | 25<br>(11.16)                                | 27<br>(11.49)                                |
| <b>Number of study drug exposure periods, median (IQR)</b> | 5<br>(3-9)                                   | 3<br>(3-7)                                   | 5<br>(3-9)                                   | 5<br>(3-9)                                   | 3<br>(3-5)                                   | 5<br>(3-9)                                   | 3<br>(3-7)                                   | 4<br>(3-7)                                   | 3<br>(3-7)                                   |
| <b>Rate of admission per 100 person-years (95% CI)</b>     | 23.81<br>(22.91-24.75)                       | 24.46<br>(22.63-26.45)                       | 23.94<br>(22.39-25.59)                       | 20.27<br>(19.28-21.31)                       | 17.52<br>(15.35-20.01)                       | 19.14<br>(17.51-20.92)                       | 27.47<br>(26.27-28.72)                       | 22.14<br>(20.43-24.37)                       | 29.62<br>(27.49-31.92)                       |
| <b>Psychiatric admissions on/off study drug, N</b>         | 587/<br>1984                                 | 130/<br>499                                  | 240/<br>623                                  | 292/<br>1242                                 | 41/<br>177                                   | 112/<br>374                                  | 491/<br>1429                                 | 151/<br>343                                  | 166/<br>521                                  |
| <b>Time on/off study drug, person-years</b>                | 2.6x10 <sup>3</sup> /<br>8.2x10 <sup>3</sup> | 7.8x10 <sup>2</sup> /<br>1.8x10 <sup>3</sup> | 8.6x10 <sup>2</sup> /<br>2.7x10 <sup>3</sup> | 1.5x10 <sup>3</sup> /<br>6.1x10 <sup>3</sup> | 3.1x10 <sup>2</sup> /<br>9.3x10 <sup>2</sup> | 5.6x10 <sup>2</sup> /<br>2.0x10 <sup>3</sup> | 2.1x10 <sup>3</sup> /<br>4.9x10 <sup>3</sup> | 8.1x10 <sup>2</sup> /<br>1.4x10 <sup>3</sup> | 6.5x10 <sup>2</sup> /<br>1.7x10 <sup>3</sup> |

**eTable 4. Baseline Characteristics of Patients Experiencing Nonpsychiatric Hospitalization**

|                                                       | HMG-CoA reductase inhibitors |                  |                  | L-type calcium channel antagonists |                  |                  | Biguanides       |                  |                  |
|-------------------------------------------------------|------------------------------|------------------|------------------|------------------------------------|------------------|------------------|------------------|------------------|------------------|
|                                                       | BPD                          | Schizophrenia    | NAP              | BPD                                | Schizophrenia    | NAP              | BPD              | Schizophrenia    | NAP              |
| <b>N</b>                                              | 9,659                        | 4,086            | 4,879            | 7,033                              | 2,571            | 3,843            | 4,985            | 3,237            | 2451             |
| <b>Age at start of follow-up, mean (SD)</b>           | 57.34<br>(12.51)             | 54.53<br>(12.56) | 60.98<br>(14.29) | 58.29<br>(13.63)                   | 58.65<br>(12.31) | 64.60<br>(14.91) | 53.29<br>(14.72) | 53.27<br>(13.44) | 55.78<br>(15.98) |
| <b>Female sex, N (%)</b>                              | 5,483<br>(56.77)             | 1,794<br>(43.91) | 2,790<br>(57.18) | 4,147<br>(58.96)                   | 1,222<br>(47.53) | 2,442<br>(63.69) | 2,943<br>(59.04) | 1,464<br>(45.23) | 1,392<br>(56.79) |
| <b>Swedish born, N (%)</b>                            | 8,331<br>(86.25)             | 3,163<br>(77.41) | 3,705<br>(75.94) | 6,119<br>(87.00)                   | 2,005<br>(77.99) | 3,010<br>(78.51) | 4,195<br>(84.15) | 2,439<br>(75.35) | 1,701<br>(69.40) |
| <b>Died during follow-up, N (%)</b>                   | 2,250<br>(23.29)             | 1,113<br>(27.24) | 1,551<br>(31.79) | 1,816<br>(25.82)                   | 943<br>(36.68)   | 1,472<br>(38.39) | 1,164<br>(23.35) | 949<br>(29.32)   | 694<br>(28.31)   |
| <b>Psychiatric treatment during follow-up, N (%):</b> |                              |                  |                  |                                    |                  |                  |                  |                  |                  |
| Antipsychotic                                         | 7,451<br>(77.14)             | 4,046<br>(99.02) | 4,656<br>(95.43) | 5,193<br>(73.84)                   | 2,541<br>(98.83) | 3,658<br>(95.41) | 4,161<br>(83.47) | 3,223<br>(99.57) | 2,372<br>(96.78) |
| Lithium                                               | 4,363<br>(45.17)             | 133<br>(3.26)    | 110<br>(2.25)    | 3,250<br>(46.21)                   | 72<br>(2.80)     | 66<br>(1.72)     | 2,134<br>(42.81) | 117<br>(3.61)    | 83<br>(3.39)     |
| Anticonvulsant                                        | 4,983<br>(51.59)             | 700<br>(17.13)   | 762<br>(15.62)   | 3,627<br>(51.57)                   | 406<br>(15.79)   | 538<br>(14.03)   | 2,599<br>(52.14) | 532<br>(16.43)   | 387<br>(15.79)   |
| <b>Physical health by end of follow-up, N (%):</b>    |                              |                  |                  |                                    |                  |                  |                  |                  |                  |
| Cardiovascular or cerebrovascular disease             | 7,748<br>(80.22)             | 3,024<br>(74.01) | 4,092<br>(83.87) | 6,131<br>(87.17)                   | 2,240<br>(87.13) | 3,488<br>(90.98) | 3,466<br>(69.53) | 2,096<br>(64.75) | 1,815<br>(74.05) |
| Type II Diabetes Mellitus                             | 3,802<br>(39.36)             | 2,156<br>(52.77) | 1,919<br>(39.33) | 2,006<br>(28.52)                   | 1,010<br>(39.28) | 1,118<br>(29.16) | 3,985<br>(79.94) | 2,711<br>(83.75) | 2,028<br>(82.74) |
| Hypertension                                          | 5,482<br>(56.76)             | 1,934<br>(47.33) | 3,070<br>(62.92) | 5,414<br>(76.98)                   | 1,939<br>(75.42) | 3,100<br>(80.86) | 2,585<br>(51.86) | 1,394<br>(43.06) | 1,384<br>(56.47) |
| Hyperlipidemia                                        | 2,001                        | 676              | 1,143            | 878                                | 242              | 554              | 739              | 370              | 363              |

|                                                         |                                              |                                              |                                              |                                              |                                              |                                                |                                              |                                              |                                              |
|---------------------------------------------------------|----------------------------------------------|----------------------------------------------|----------------------------------------------|----------------------------------------------|----------------------------------------------|------------------------------------------------|----------------------------------------------|----------------------------------------------|----------------------------------------------|
|                                                         | (20.72)                                      | (16.54)                                      | (23.43)                                      | (12.48)                                      | (9.41)                                       | (14.45)                                        | (14.82)                                      | (11.43)                                      | (14.81)                                      |
| <b>Number of study drug exposure periods, mean (SD)</b> | 5<br>(2-10)                                  | 4<br>(2-8)                                   | 5<br>(2-9)                                   | 5<br>(3-11)                                  | 3<br>(3-7)                                   | 5<br>(3-11)                                    | 4<br>(3-7)                                   | 3<br>(3-7)                                   | 5<br>(3-9)                                   |
| <b>Rate of admission per 100 person-years (95% CI)</b>  | 52.69<br>(52.23-53.15)                       | 45.74<br>(45.08-46.40)                       | 58.86<br>(58.17-59.55)                       | 47.57<br>(47.35-47.79)                       | 46.85<br>(46.49-47.23)                       | 61.32<br>(60.92-61.72)                         | 51.73<br>(51.10-52.37)                       | 42.12<br>(41.41-42.84)                       | 53.35<br>(52.42-54.28)                       |
| <b>Psychiatric admissions on/off study drug, N</b>      | 14865/<br>36470                              | 6838/<br>11684                               | 7929/<br>20131                               | 8918/<br>28459                               | 4131/<br>8426                                | 5325/<br>17301                                 | 6390/<br>19349                               | 4811/<br>8531                                | 3053/<br>9546                                |
| <b>Time on/off study drug, person-years</b>             | 2.3x10 <sup>4</sup> /<br>7.4x10 <sup>4</sup> | 1.3x10 <sup>4</sup> /<br>2.7x10 <sup>4</sup> | 1.2x10 <sup>4</sup> /<br>3.6x10 <sup>4</sup> | 1.5x10 <sup>4</sup> /<br>5.7x10 <sup>4</sup> | 7.3x10 <sup>3</sup> /<br>1.8x10 <sup>4</sup> | 8.1x10 <sup>3</sup> /<br>2.9.4x10 <sup>4</sup> | 1.3x10 <sup>4</sup> /<br>3.7x10 <sup>4</sup> | 1.1x10 <sup>4</sup> /<br>2.0x10 <sup>4</sup> | 5.9x10 <sup>3</sup> /<br>1.8x10 <sup>4</sup> |

**eTable 5. Baseline Characteristics of Patients Prescribed Thiazide Diuretics**

|                                                            | Psychiatric hospitalization              | Self-harm                                | Nonpsychiatric hospitalization           |
|------------------------------------------------------------|------------------------------------------|------------------------------------------|------------------------------------------|
| <b>N</b>                                                   | 2,685                                    | 365                                      | 4,309                                    |
| <b>Age at start of follow-up, mean (SD)</b>                | 58.78<br>(13.60)                         | 52.87<br>(13.15)                         | 61.46<br>(13.76)                         |
| <b>Female sex, N (%)</b>                                   | 1,692 (63.02)                            | 229 (62.74)                              | 2,757 (63.98)                            |
| <b>Swedish born, N (%)</b>                                 | 2,274 (85.10)                            | 303 (83.01)                              | 3,677 (85.33)                            |
| <b>Died during follow-up, N (%)</b>                        | 705 (26.26)                              | 80 (21.92)                               | 1,365 (31.68)                            |
| <b>Psychiatric treatment during follow-up, N (%):</b>      |                                          |                                          |                                          |
| Antipsychotic                                              | 2,475 (92.18)                            | 322 (88.22)                              | 3,725 (86.45)                            |
| Lithium                                                    | 649 (24.17)                              | 94 (25.75)                               | 909 (21.10)                              |
| Anticonvulsant                                             | 1,043 (38.85)                            | 202 (55.34)                              | 1,486 (34.49)                            |
| <b>Physical health by end of follow-up, N (%):</b>         |                                          |                                          |                                          |
| Cardiovascular or cerebrovascular disease                  | 2,212 (82.38)                            | 307 (84.11)                              | 3,787 (87.89)                            |
| Type II Diabetes Mellitus                                  | 739 (27.52)                              | 97 (26.58)                               | 1,280 (29.71)                            |
| Hypertension                                               | 1,951 (72.66)                            | 272 (74.52)                              | 3,343 (77.58)                            |
| Hyperlipidemia                                             | 305 (11.36)                              | 44 (12.05)                               | 512 (11.88)                              |
| <b>Number of study drug exposure periods, median (IQR)</b> | 5 (3-9)                                  | 3 (3-7)                                  | 3 (3-7)                                  |
| <b>Rate of admission per 100 person-years (95% CI)</b>     | 41.51 (40.76-42.28)                      | 23.47 (21.88-25.18)                      | 51.72 (51.03-52.41)                      |
| <b>Psychiatric admissions on/off study drug, N</b>         | 1755/9674                                | 151/626                                  | 3452/18369                               |
| <b>Time on/off study drug, person-years</b>                | 4.6x10 <sup>3</sup> /2.3x10 <sup>4</sup> | 5.9x10 <sup>2</sup> /2.7x10 <sup>3</sup> | 7.1x10 <sup>3</sup> /3.5x10 <sup>4</sup> |
